## REVIEW ARTICLE

## Pathophysiology and clinical implications of perioperative fluid excess

K. Holte<sup>1\*</sup>, N. E. Sharrock<sup>2</sup> and H. Kehlet<sup>1</sup><sup>1</sup>Department of Surgical Gastroenterology, Hvidovre University Hospital, DK-2650 Hvidovre, Denmark.<sup>2</sup>Department of Anesthesiology, Hospital for Special Surgery, New York, USA

\*Corresponding author

Br J Anaesth 2002; 89: 622–32

**Keywords:** complications, hypervolaemia; fluid balance; safety, techniques

The practice of perioperative fluid therapy is variable, ranging from 'high volume' to 'dry' regimen. A review of the data on the effect of 'high volume' perioperative fluid therapy suggests that the resulting overhydration may have deleterious effects on cardiac and pulmonary function, and on recovery of gastrointestinal motility (postoperative ileus), tissue oxygenation, wound healing and coagulation. These observations call for randomized studies of the effects of 'high' vs 'low' volume replacement therapy on postoperative morbidity, in order to establish evidence-based guidelines for perioperative fluid management.

Perioperative fluid replacement has been, and still is, the focus of much debate. This debate has primarily focused on the various types of fluid components available for replacement therapy, and not on the actual amount of fluid administered.

The principles of perioperative fluid therapy were fostered in the late 1950s and early 1960s. Recommendations for restricted fluid regimen came primarily from Francis Moore,<sup>85</sup> arguing that the net effect of the obligatory metabolic–endocrine response to trauma, which is conservation of water and sodium, implied restriction in fluid delivery. In contrast, Tom Shires<sup>129</sup> postulated a decrease in extracellular volume after surgery, due to internal redistribution of fluids, the 'third space' losses, and advocated replacement of these losses by additional fluid infusion. These considerations were supported by studies during the Korean War, where large amounts of fluid were administered in trauma patients with improved survival, thereby also influencing the recommendations for elective surgery.<sup>6</sup> The concept of resuscitation in order to achieve supranormal circulatory function was developed in the 1970s and 1980s by Shoemaker,<sup>130</sup> and obtained primarily by the use of fluid infusions and inotropes. Clinical practice

has largely been influenced by Shires' recommendations and it has not been uncommon to see very large amounts of fluid administered in elective surgical procedures, way in excess of the actual losses. This is especially the case in major aortic or abdominal surgery, where 4–6 litres or more of intraoperative fluid substitution (apart from replacement of blood losses) have been given,<sup>22 35 66 134</sup> or in peripheral vascular surgery with more than 6 litres of fluid administered within surgery and the first 24 h after surgery, despite a minimal blood loss.<sup>19</sup> Up to 4 litres of fluid have been administered within the first 24 h in patients undergoing laparoscopic cholecystectomy.<sup>36</sup> In contrast, in thoracic surgery, relatively 'dry' regimen have been considered to be beneficial, due to the association between the amount of administered fluid and the development of post-pneumectomy pulmonary oedema.<sup>52 133 149</sup>

Several issues in perioperative management may account for the administration of excessive amounts of fluid, including concern about preoperative fluid deficits (dehydration, primarily derived from prolonged preoperative fasting and bowel preparation), attempts to support the circulation and cardiac function after general and regional anaesthesia, attempts to control the circulation postoperatively, administration of crystalloid or colloid to avoid blood transfusion, preservation of urine output and preservation of a high CVP from fluid infusion.

Administration of excess fluid may cause several problems after surgery. The resulting increased demands on cardiac function, due to an excessive shift to the right on the Starling myocardial performance curve, may potentially increase postoperative cardiac morbidity. Fluid accumulation in the lungs may predispose patients to pneumonia and respiratory failure. The excretory demands of the kidney are increased, and the resulting diuresis may lead to urinary

**Table 1** Hormonal responses to surgery and fluid overload

| Hormone                    | Response to surgery<br>(Reference numbers) | Response to overload        | Effect on fluid distribution                    |
|----------------------------|--------------------------------------------|-----------------------------|-------------------------------------------------|
| Aldosterone                | Increase (27, 143)                         | Decrease (142)              | Sodium and fluid retention; potassium excretion |
| Antidiuretic hormone       | Increase (27, 143)                         | Decrease (48)               | Water retention                                 |
| Renin-angiotensin II       | Increase (27, 143)                         | Decrease (2–4, 94, 142)     | Sodium and fluid retention; potassium excretion |
| Atrial natriuretic peptide | Increase or no change (59, 62, 63)         | Increase (54, 68, 119, 146) | Diuretic; natriuretic                           |

retention mediated by the inhibitory effects of anaesthetics and analgesics on bladder function. Gastrointestinal motility may be inhibited, prolonging postoperative ileus. Excess fluid may decrease tissue oxygenation with implications for wound (anastomotic) healing. Finally, coagulation may be enhanced with crystalloids, which may predispose patients to postoperative thrombosis.

In this review we summarize the pathophysiology of perioperative fluid excess, and review the effects of it on organ function and the potential clinical implications. We discuss the aspects of fluid management in regional anaesthesia, and the implications of immobilization on fluid homeostasis. We focus on perioperative fluid therapy in elective surgical procedures. We do not intend to present recommendations on fluid replacement strategies, or to discuss the various components available for fluid replacement or the current methods of monitoring fluid balance. Furthermore, we do not intend to discuss the treatment options for hypovolaemia or the use of i.v. fluids in critically ill patients.

## Surgical stress and fluid responses

Water makes up 60% of total body weight, one third of it being extracellular fluid volume (ECV) (interstitial fluid and plasma), and two thirds being intracellular volume. Transportation of fluid between the body compartments is regulated by the Starling equilibrium, the decisive variables being differences in hydrostatic and colloid osmotic pressure, and specific permeability coefficients. In response to surgery, serum colloid osmotic pressure is decreased,<sup>64 125</sup> which is primarily caused by increased capillary permeability, resulting in fluid shifts from the vascular bed to the interstitial fluid.<sup>60 125</sup> Dilution secondary to crystalloid infusions may also contribute.<sup>71</sup> In addition, as a physiological response to a decrease in intravascular pressure, fluid movement from the extravascular to the intravascular space occurs, as demonstrated in a human volunteer study where experimental hypovolaemia led to fluid movements from tissue to blood.<sup>74</sup>

Changes in ECV after surgery have been much debated, and fluid replacement today is greatly influenced by Shires,<sup>127 129</sup> who postulated a decrease in *functional* (i.e. exchangeable) ECV after elective surgical procedures and haemorrhagic shock. According to Shires, surgical trauma *per se* (without administration of fluids) led to a decrease in

functional ECV, which was proportional to the degree of surgical trauma.<sup>129</sup> Shires primarily explained the decrease in functional ECV by sequestration of fluids within the traumatized area or expansion of the intracellular volume, and therefore advocated replacement of these losses with additional saline infusions.<sup>110 128 129</sup> However, these observations have been contradicted by several other investigators reporting unchanged,<sup>40 65 91 138</sup> or even increased,<sup>21 112</sup> ECV in postoperative patients, and studies in major surgery suggest that ECV expansion may correlate with intraoperative fluid administration.<sup>93 112</sup> Thus, a positive fluid balance of 3 litres was associated with unchanged ECV, but a smaller or larger fluid excess with a decrease or increase in ECV, respectively.<sup>93</sup> In other studies, intracellular volume has been found to be decreased after surgery (intracellular dehydration).<sup>31</sup> Difficulty in obtaining accurate measurements of the fluid phases is generally recognized,<sup>86</sup> however, and may relate to the use of isotopes with different volumes of distribution, different equilibrium times and general changes in equilibrium times and distribution volumes as a consequence of the surgical trauma.

Therefore, despite 30 yr of research, perioperative ECV changes have not been clarified. However, the present data suggest that the magnitude of ECV decrease suggested by Shires may not be accurate, partly because the type of surgery, anaesthesia and perioperative fluid management were not standardized. Further studies are required to assess ECV changes after surgery with standardized regimen.

Surgery elicits a stress response of combined endocrine and inflammatory origin.<sup>27 143</sup> Several of the hormones involved in this response may exert a potentially profound influence on the distribution of body fluids (Table 1). Generally, the endocrine response to surgical trauma leads to conservation of sodium and water and to excretion of potassium, the principal mediators being antidiuretic hormone (ADH), aldosterone and the renin-angiotensin II system.<sup>27 143</sup> The increased ADH secretion leads to enhanced water reabsorption in the kidney, resulting in a postoperative decrease in diuresis and a decrease in plasma concentrations of sodium. The increased secretion of aldosterone and renin leads to conservation of sodium and excretion of potassium. Several other mediators, enhanced by the surgical stress, may influence the distribution of fluid. Thus, increased cortisol secretion, an obligatory stress response, may be of major importance in the control fluid

homeostasis, primarily through permissive actions to maintain capillary integrity.<sup>117</sup> In addition, the cortisol-induced inhibition of excessive inflammatory activity response to trauma may reduce postoperative fluid shifts.<sup>117</sup> Atrial natriuretic peptide (ANP) secretion in response to surgery is unclear because ANP secretion may be increased in older patients, in contrast to unchanged ANP levels in younger patients.<sup>59 62 63</sup> ANP may induce natriuresis, diuresis and inhibition of aldosterone and ADH secretion.<sup>90</sup> Furthermore, inflammatory mediators, like IL-6, TNF, substance-P and bradykinin may act as vasodilators and increase capillary permeability. The release of these inflammatory mediators is proportional to the magnitude of the surgical trauma.<sup>58</sup> The hormonal release in response to surgical trauma therefore generally induces a shift toward water and sodium retention, while the excretion of potassium is increased, paralleling the increase in catabolism.

Studies in healthy volunteers make it possible to investigate the individual factors of importance in perioperative fluid balance, independently of the surgical trauma; the surgically induced factors, such as increased capillary permeability, are eliminated when studying volunteers. In order to investigate the effects of the stress responses seen after surgery *per se*, continuous infusions (>2 days) of cortisol/hydrocortisone, glucagon and epinephrine have, in three studies in healthy volunteers, been found to decrease sodium excretion and increase potassium excretion.<sup>10 11 140</sup> Furthermore, in two of these studies a weight gain of approximately 0.4 and 1.7 kg, respectively, was seen.<sup>11 140</sup> These findings were not modified by the concomitant infusion of an inflammatory agent (ethiocholanolone),<sup>140</sup> despite an increased acute phase protein response. These results demonstrate that activation of the stress response leads to fluid retention.

In contrast, several of the stress responses to injury may be influenced by fluid volume expansion *per se*. Increased capillary permeability leading to increased filtration of plasma proteins was seen after infusion of Dextran 1000 ml or 360 ml of albumin in healthy volunteers.<sup>96</sup> The inhibition of aldosterone secretion with fluid infusions is well established, both in healthy volunteers and surgical patients.<sup>142</sup> Attenuation of ADH secretion seems only to occur with high volume fluid infusions of about 50 ml min<sup>-1</sup>,<sup>48</sup> while lower infusion volumes of 15 ml min<sup>-1</sup><sup>12</sup> or 15 ml kg<sup>-1</sup> h<sup>-1</sup><sup>132</sup> did not attenuate it. ANP secretion is increased after saline infusion in healthy volunteers,<sup>54 68 119 146</sup> but the response is transient and occurs within and immediately after the infusion. The renin-angiotensin II secretion is inhibited with fluid administration, and evidence suggests that the renin-angiotensin II system is of major importance in the excretion of a fluid overload.<sup>2-4 29 94 142</sup> However, there is no systematic evaluation of ANP and renin responses to fluid regimen in surgical procedures.

A large fluid volume therefore influences several of the hormonal responses to injury in surgical patients (decrease in ADH, decrease in aldosterone), while the effect of fluid

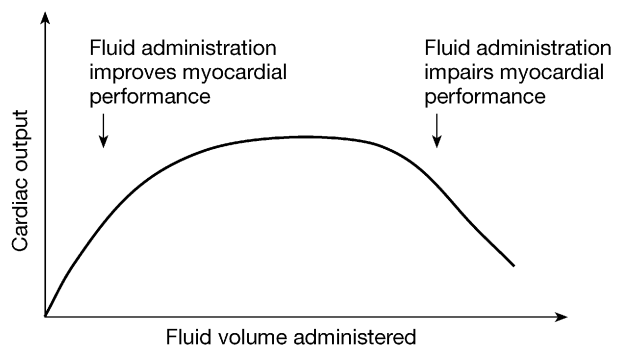

**Fig 1** Effects of perioperative fluid therapy on the Starling myocardial performance curve.

administration on other hormones known to be increased postoperatively (renin and ANP) has only been systematically evaluated in healthy volunteers. Thus, the effects of perioperative fluid administration on the stress responses to surgery are unclear and need to be evaluated in clinical studies comparing high vs low fluid regimen.

## Organ dysfunction and postoperative complications

### Cardiac function and morbidity

The physiological relationship between cardiac filling and cardiac output is described in Starling's myocardial performance curve (Fig. 1). The curve describes the functional consequences of alterations in preload on cardiac output, and is the rationale behind improvement of cardiac output by volume administration. Until a certain point, volume expansion leads to increased cardiac output due to increased end-diastolic ventricular filling. Beyond that point, increased end-diastolic volume will lead to a decrease in cardiac output due to depression of ventricular function. Measurements of cardiac responses (primarily cardiac output) in response to a fluid load have been used to define the optimal ventricular filling pressures (evaluated by pulmonary artery catheter measurements).<sup>15 77 141</sup> However, although increases in end-diastolic filling pressures may increase cardiac output, the effects on other aspects of ventricular function, such as the ejection fraction and end-systolic pressure, may occur at different filling pressures.<sup>76</sup> This makes determination of the effect of the optimal end-diastolic filling pressure on overall cardiac function difficult by intravascular catheter measurements. In one study during cardiac surgery, plasma volume expansion to achieve maximal ventricular stroke volume assessed by oesophageal Doppler measurements (on average 900 ml crystalloid and 1400 ml colloid) led to a significantly better perfusion of the gastrointestinal mucosa and a significant decrease in major postoperative complications (major infections, stroke, paralytic ileus, respiratory failure and death).<sup>89</sup> Furthermore, in a

randomized study in 40 patients undergoing surgery for hip fracture, intraoperative fluid infusion to maximize ventricular stroke volume (on average 750 ml of colloid infusion) led to improvements in postoperative mobilization and hospital stay.<sup>131</sup> In these studies, however, patients did not receive excessive fluid, but were adequately resuscitated, thus optimizing their position on the Starling curve. In a prospective study of 4059 patients undergoing major elective non-cardiac surgery, patients who underwent perioperative right-heart catheterization had a threefold increase in the incidence of major postoperative cardiac events (ischaemic events, arrhythmia or heart failure) compared with patients who were not catheterized (15.4 vs 3.6%).<sup>104</sup> The catheterized patients were also given more fluids (net fluid balance of 3.2 vs 2.0 litres), and the authors suggested that the adverse outcome was due, at least in part, to excessive fluid administration. However, since fluid administration was determined by right-heart catheterization and not investigated *per se*, these results are inconclusive with regard to the potentially deleterious effects of fluid overload.

Fluid loading to optimize cardiac function should therefore be guided by the Starling curve, and may have beneficial effects on postoperative organ function. Theoretically, perioperative infusions of excessive amounts of fluid may increase cardiovascular demands and morbidity. However, this has not been specifically investigated in randomized studies comparing low vs high fluid regimen.

### *Pulmonary function and complications*

Removal of excess fluid from the alveolar space is also driven by active sodium transport, and not only, as previously believed, by differences in hydrostatic and colloid osmotic pressures.<sup>79</sup> The sodium channels involved may potentially be upregulated by catecholamines and glucocorticoids as well as by proinflammatory cytokines, all of which are increased in response to surgery,<sup>79</sup> and modified by fluid administration as already discussed. This may account for the conflicting evidence from previous studies examining the relations between fluid administration and pulmonary oedema.<sup>52</sup> In response to an i.v. saline load of 22 ml kg<sup>-1</sup> in healthy volunteers, functional residual capacity decreased by 10% and diffusing capacity by 6%, both of which had not returned to normal 40 min after the infusion (later measurements were not made).<sup>45</sup> In another study in five volunteers, infusion of 1 litre of isotonic saline led to small decreases in total lung capacity (about 0.25 litres) and forced vital capacity (about 0.1 litres), which returned to normal after 1 h. Infusion of 2 litres of normal saline led to a similar decrease in the same variables; the effects were still present 1 h after the infusion, but recovered after subsequent furosemide administration.<sup>23</sup>

The incidence of pulmonary oedema after lung surgery may be as high as 12–15%.<sup>52</sup> The pathogenesis is unclear, but impaired lymphatic drainage, the extent of surgical

injury and one-lung ventilation may be of importance. The volume of fluids administered during the perioperative course has been found to correlate with the development of post-pneumonectomy pulmonary oedema.<sup>133 137 149</sup> In retrospective studies, a 24-h fluid replacement of >3 litres,<sup>97</sup> and intra-operative fluid load of 2000 ml or more,<sup>95</sup> were predictive factors for the development of post-pneumonectomy pulmonary oedema. However, in some retrospective studies, post-pneumonectomy pulmonary oedema was not related to the volume of administered fluids.<sup>135 139</sup> These findings have not been investigated in randomized clinical trials comparing high vs low fluid regimen.

In non-thoracic surgery, excessive fluid administration may also result in adverse respiratory function. In 13 patients, the development of lung oedema after various elective surgical procedures correlated with a net fluid retention exceeding 67 ml kg<sup>-1</sup> day<sup>-1</sup>.<sup>5</sup> In a randomized study between general and regional anaesthesia in peripheral vascular surgery with minimal blood loss, patients received more than 6 litres of crystalloid infusion within 24 h after surgery.<sup>19</sup> Despite the low surgical stress, the overall pulmonary morbidity was exceptionally high, since 10% of the patients developed respiratory failure.<sup>19</sup>

### *Renal function and urinary retention*

Since the kidneys are responsible for excretion of the majority of administered fluids, renal functional demands are increased in a state of fluid overload. In addition, the hormonal responses after injury may decrease water and sodium excretion, primarily due to the enhanced secretion of ADH, aldosterone and renin.<sup>27</sup> The glomerular filtration rate (GFR) was significantly increased with administration of 210–300 ml m<sup>-2</sup> h<sup>-1</sup> of a balanced salt solution compared with 75–200 ml m<sup>-2</sup> h<sup>-1</sup> during surgery.<sup>47</sup> In 53 patients undergoing major vascular surgery, GFR was also found to increase after surgery, with cumulated fluid balances of 2.2–6 litres, explained by an increase in ECV, renal plasma flow or both.<sup>92</sup> On the other hand, several studies in healthy volunteers have demonstrated that excretion of an acute saline overload (22 ml kg<sup>-1</sup>) takes approximately 2 days.<sup>28–30</sup> Of 20 burn patients receiving an overload of 3–7 litres, only ten had excreted the overload within 1 week.<sup>39</sup> The prolonged fluid elimination has been found to correlate with elevated levels of urodilatin (an ANP-related polypeptide), and decreased levels of renin in healthy volunteers.<sup>28 29</sup>

General anaesthesia may exert an inhibitory effect on renal haemodynamics and function, reflected in the depression of GFR, urinary volume and sodium excretion.<sup>26</sup> However, the relationship between haemodynamics and renal function is not clear. Thus, in 987 patients undergoing total hip replacement with hypotensive epidural anaesthesia, in which intraoperative fluid averaged 1200 ml, renal dysfunction was not present.<sup>124</sup>

Without fluid load, urine output is negligible under general anaesthesia.<sup>25</sup> Consequently, fluid is generally administered to maintain a higher urine output, based upon a fear that renal failure may develop if urine flow is low.<sup>126</sup> However, there is no evidence of an association between low urine output *per se* and the development of renal failure (providing hypovolaemia is not present), as demonstrated in 137 consecutive patients undergoing abdominal aortic revascularization, where intraoperative urine output did not predict postoperative renal function.<sup>1</sup> Optimal preoperative fluid loading using the Starling curve (left side of the Starling curve, Fig. 1) has not been proven to prevent postoperative renal insufficiency.<sup>108</sup> In 100 critically ill patients, development of oliguria was not related to the amounts of fluid administered,<sup>147</sup> and it occurred in the presence of normal blood urea and creatinine. In 24 patients undergoing major neck surgery and randomized to 'generous' or 'restricted' fluid regimen, intraoperative urine output in the 'restricted' fluid group was  $0.4 \text{ ml kg}^{-1} \text{ h}^{-1}$  compared with  $1.33 \text{ ml kg}^{-1} \text{ h}^{-1}$  in the 'generous' fluid group.<sup>106</sup> Nevertheless, postoperative renal function remained normal in both groups. In 14 adult recipients of living-donor kidneys, who were randomly assigned to high fluid replacement (urine output plus  $30 \text{ ml h}^{-1}$ ) or low fluid replacement (constant  $125 \text{ ml h}^{-1}$ ), urine output was significantly higher in the high-replacement group, and urine osmolality was significantly higher in the low-replacement group.<sup>43</sup> However, no differences were found between groups in 48-h fluid balance or GFR.

Intraoperative oliguria due to moderate fluid restriction is not therefore detrimental to renal outcome. Excretion of a fluid excess in the range of 1.5–2 litres may take more than 2 days in healthy volunteers and even more in surgical patients, indicating that the functional demands of the kidney may be increased for up to a week after surgery, depending on the nature and amount of fluid administered and the magnitude of surgery. However, the role of fluid excess in postoperative renal morbidity is unknown.

Urinary retention is commonly seen after surgery, and is a recognized complication of spinal and epidural local anaesthetic techniques, as well as postoperative opioid analgesia, due to their inhibitory effects on bladder muscle function.<sup>7 101</sup> A fluid overload may therefore increase the risk of postoperative urinary retention. However, urinary retention may occur also in the absence of overload, as in patients with prostate hypertrophy. Compared with other surgery, patients having anal or hernia surgery are at greater risk of developing postoperative urinary retention.<sup>98</sup> Thus, restriction of perioperative fluids in anorectal surgery reduces the risk of urinary retention.<sup>8 16 100 120</sup> In hernia surgery, perioperative administration of  $>1200 \text{ ml}$  of fluid<sup>103</sup> or fluid infusions of  $>750 \text{ ml}^{46}$  was significantly associated with an increase in the incidence of urinary retention. In a randomized study in 133 hernia patients, administration of  $<500 \text{ ml}$  fluid compared with  $1300 \text{ ml}$ , led to a lower (although non-significant) incidence of urinary

retention.<sup>61</sup> However, a randomized study of intraoperative administration of  $2 \text{ ml kg}^{-1}$  vs  $10 \text{ ml kg}^{-1}$  of i.v. fluid to low-risk outpatients (no hernia or anal surgery, and no history of urinary retention in patients with regional anaesthesia),<sup>98</sup> found no difference in urinary retention between the groups. Retrospective studies in patients undergoing hysterectomy,<sup>99</sup> appendectomy,<sup>101</sup> and cholecystectomy,<sup>102</sup> did not find significant correlations between fluid administration and postoperative urinary retention.

### *Abdominal compartment syndrome and gastrointestinal function*

The abdominal compartment syndrome (ACS) is defined as a postoperative or post-traumatic elevation in intra-abdominal pressure leading to adverse physiological effects, most commonly respiratory and renal failure.<sup>14</sup> Development of ACS may be associated with the administration of large amounts of fluid. Thus, the crystalloid volume administered to six patients with ACS was found to be 19 litres in  $<24 \text{ h}$ .<sup>80</sup> Infusion of a volume equal to 15–20% of the body weight led to elevated intra-abdominal pressure and decreased respiratory function in an experimental study in pigs.<sup>88</sup> In addition, increased abdominal pressure has been found to stimulate ADH release, thus promoting further fluid retention.<sup>67</sup>

Fluid overload may lead to oedema of the gut, possibly contributing to enteric nutritional intolerance, prolonged ileus and translocation of endotoxin or bacteria, with potentially deleterious implications such as sepsis and multiorgan failure.<sup>109 144</sup> However, evidence from a study in 18 patients undergoing gastrointestinal surgery suggests that infusions of crystalloids as opposed to colloids may predispose them to the development of intestinal oedema.<sup>107</sup> These patients randomly received either lactated Ringer's solution (mean volume infused,  $3850 \text{ ml}$ ), 10% hydroxyethyl starch (mean volume infused,  $1358 \text{ ml}$ ), or 20% human albumin (mean volume infused,  $463 \text{ ml}$ ), to maintain central venous pressure at the preoperative level. Colloid osmotic pressure was unchanged in the colloid groups, and intestinal oedema was found only in the group receiving crystalloids. Results from a study in 20 patients undergoing colonic surgery and randomized to a 'standard' postoperative fluid regimen (minimum of 3 litres of water and  $154 \text{ mmol sodium day}^{-1}$ ), or a restricted postoperative fluid regimen (maximum of 2 litres of water and  $77 \text{ mmol sodium day}^{-1}$ ), found a significant reduction in postoperative ileus with fluid restriction ( $4.0$  vs  $6.5$  days).<sup>70</sup> Furthermore, postoperative hospital stay decreased from a median of 9–6 days in the patients with the restricted postoperative fluid regimen. Lowered concentrations of plasma proteins may follow administration of 2 litres of saline even in the absence of surgery,<sup>71 87</sup> and in experimental studies hypoproteinaemia was associated with decreased gastrointestinal motility.<sup>41</sup> In a prospective study in vascular surgery, an albumin concentration of  $<35 \text{ g litre}^{-1}$  did not

correlate with increased duration of postoperative ileus, compared with patients where the concentration of albumin was maintained above  $35 \text{ g litre}^{-1}$  with albumin infusions.<sup>145</sup> In experimentally performed gastrointestinal anastomoses in rabbits, administration of  $5 \text{ ml kg}^{-1} \text{ h}^{-1}$  of isotonic saline during surgery followed by 200 ml in the first 48 h after surgery (compared with no fluid administration), led to a significant increase in tissue weight at the anastomotic site, persisting for 5 days after surgery.<sup>17</sup> The resulting impairment in tissue oxygenation may potentially have deleterious effects on anastomotic healing. The available data from these studies are preliminary and need to be addressed in future, randomized, large-scale clinical trials.

### *Oedema, wound healing and tissue hypoxaemia*

Oedema is a clinical sign of subcutaneous fluid accumulation, which inevitably leads to impaired oxygen diffusion and decreased tissue oxygen tension, due to increased endothelial cellular distance. The relation between serum colloid osmotic pressure and interstitial oedema is not directly proportional, since the oedema becomes progressively greater as serum colloid pressure decreases.<sup>73</sup> Tissue oxygen tension in experimental wounds, measured by aspiration of fluid from an implanted mesh cylinder, was progressively lowered with increasing amounts of fluid administered, when 2.5, 5 or  $10 \text{ ml kg}^{-1}$  of isotonic saline solution was administered to rabbits.<sup>44</sup> Furthermore, when  $10 \text{ ml kg}^{-1}$  of isotone saline was administered, it took 3.5 days for tissue oxygen tension to recover to control values. In a randomized study in 42 patients scheduled for major abdominal surgery, 24 h of intra- and postoperative administration of 3 litres of hydroxyethyl starch and 3 litres of Ringer's solution was compared with 11.7 litres of Ringer's solution. There was a resulting significant decrease in tissue oxygen tension (measured via a catheter inserted in the deltoid muscle) in the crystalloid group.<sup>66</sup> However, in a randomized trial in major abdominal surgery, replacement of fluid according to measurements of subcutaneous oxygen tension (via a silicone catheter inserted subcutaneously in the upper arm) rather than by clinical criteria (5.7 vs 4.6 litres of crystalloid administered on the day of surgery), resulted in improved collagen accumulation in wounds.<sup>42</sup> Since wound healing may be inhibited by tissue hypoxaemia,<sup>51</sup> the risk of decreased oxygen tension secondary to interstitial fluid accumulation should be further evaluated in studies of low vs high fluid administration.

### *Coagulation*

Impaired coagulation is a recognized complication of the use of synthetic colloids for volume replacement.<sup>38</sup> In contrast, infusions of crystalloids have been demonstrated to induce a hypercoagulable state both *in vitro* and *in vivo*,<sup>114 115</sup> which is not seen with some colloid

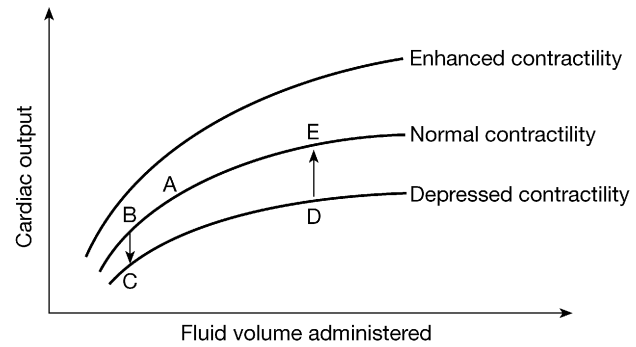

**Fig 2** Relationship between cardiac output and fluid administration. General anaesthesia or extensive epidural/spinal anaesthesia result in venodilatation and cardiac depression. Venodilatation leads to a reduction in preload depicted by transfer from Point A (baseline) to B on the normal contractility curve. Cardiac depression results in a fall to a depressed contractility curve (Point C). Restoration of cardiac output with fluid alone is depicted by the line from Point C to D. With resolution of epidural anaesthesia or emergence from general anaesthesia, the patient is apt to be hyperdynamic and fluid overloaded (Point E). By contrast, if extensive epidural/spinal anaesthesia is managed with vasopressors, restoration of contractility (Point C to B) and venous tone (Point B to A) can be achieved without fluid loading.

infusions.<sup>56</sup> The mechanisms behind the hypercoagulable effects of crystalloids are unknown, but decreased activity of anticoagulatory factors may be of importance.<sup>116</sup> These findings have been confirmed in 60 patients undergoing major abdominal surgery, randomized to receive i.v. fluids during or after the operation (i.v. Hartmann's solution 1 litre  $\text{h}^{-1}$  of operation and dextrose-saline 2–3 litres  $24 \text{ h}^{-1}$  for 2 days), or receiving no i.v. fluids during or after surgery.<sup>50</sup> The incidence of postoperative deep venous thrombosis was significantly higher in the patients receiving fluids (30%), compared with only 7% in the patients who did not receive i.v. fluid. Furthermore, the patients receiving fluids became significantly more haemodilute and hypercoagulable compared with those who did not. However, the results from this study are difficult to interpret, since administration of no intraoperative fluids in abdominal surgery is not compatible with common practice.

## **Specific considerations**

### *Regional anaesthesia*

In theory, regional anaesthesia should be followed by decreased requirements for intraoperative fluid administration due to a decrease in perioperative blood loss.<sup>57 111</sup> In a retrospective study of mortality during a 10-yr period of hip and knee replacement surgery, mortality decreased from 0.4 to 0.1% concomitant with extensive changes in anaesthetic technique, including a shift from general to epidural anaesthesia.<sup>121</sup> In addition, intraoperative fluid administration was reduced from 3108 to 1563 ml during that 10-yr period. Although cardiac output may be increased by

increasing preload (Fig. 2), it may also be increased by administering sympathomimetics, leading to improved myocardial contractility with unchanged preload. Regional anaesthesia to the upper thoracic dermatomes is associated with a significant reduction in preload and an impairment of cardiac sympathetic drive, resulting in a reduction in cardiac output and hypotension.<sup>123</sup> A substantial volume of fluid is required to augment cardiac output in this setting,<sup>148</sup> whereas vasopressors with  $\alpha$  and  $\beta$  activity, such as ephedrine,<sup>122</sup> dopamine<sup>72</sup> or epinephrine, can restore cardiac output without excessive volume administration. Low levels of spinal or epidural anaesthesia (T8 or below) usually result in minimal circulatory changes, as the compensatory vasoconstriction in the upper part of the body is sufficient to offset the dilatation in the lower extremities.<sup>69</sup> In this setting, excessive fluid is usually not needed to preserve haemodynamic stability. Thus, fluid administration prior to spinal or epidural anaesthesia, in an attempt to prevent hypotension, is a common cause of fluid overload in otherwise healthy patients (Fig. 2), and may amount to several litres of fluid administered prior to surgery.<sup>105</sup> Several randomized clinical trials of preload vs no preload in women undergoing Caesarean section,<sup>49 113</sup> and elderly patients with hip fractures,<sup>13</sup> have found that a preload produces a marginal, if any, reduction in the incidence of hypotension. The lack of effect may be attributed to several factors, such as only a transient volume expansion from the infused fluids, or increased secretion of ANP.<sup>105</sup> Whatever the type of infused solution, rapid i.v. administration causes a significant increase in central venous pressure,<sup>55</sup> pulmonary wedge pressure<sup>78</sup> and haemodilution,<sup>136</sup> with possible detrimental consequences from increased lung water content.<sup>75</sup> A more rational approach may therefore be the use of vasopressors instead of a high-volume preload during regional anaesthesia. A randomized study comparing an ephedrine infusion with a 15 ml kg<sup>-1</sup> crystalloid infusion in 54 patients undergoing elective gynaecological surgery with spinal anaesthesia, reported a significantly lower incidence of hypotension with the ephedrine infusion (22 vs 55%).<sup>34</sup>

### Immobilization

Prolonged bed rest, which commonly occurs after major surgery, leads to a decrease in plasma volume of 300–500 ml, as well as a decrease in blood volume with negative sodium balance and loss of total body water.<sup>18 82 83</sup> These changes occur within the first few days of bed rest. Concomitantly, the extracellular volume has been found to be relatively increased compared with the intravascular volume during 1–2 weeks of bed rest.<sup>37 81</sup> The effect of bed rest on the hormones influencing fluid balance is debatable since either a small increase,<sup>81</sup> or no change,<sup>18</sup> in aldosterone and renin activity has been observed. Bed rest *per se* has been demonstrated to lead to a decrease in muscle potassium and intracellular water (intracellular dehydration)

after 4 days of immobilization in healthy volunteers.<sup>9</sup> Exercise may improve renal osmolar clearance in healthy volunteers.<sup>32</sup> In another study in healthy volunteers, physical exercise after 7 days of bed rest had only negligible effects on fluid and ion balance compared with no exercise.<sup>150</sup> Further data from healthy volunteers indicate that mild exercise may increase urine flow and GFR above levels found at rest, and that only more severe exercise inhibits renal function, probably due to increased secretion of aldosterone and ADH, and a reduced GFR.<sup>53</sup>

The effects of immobilization on fluid balance *per se* have not been investigated in surgical patients, and whether fluid excretion is promoted by postoperative mobilization remains to be clarified. These issues may have important clinical implications due to the adverse effects on organ function of an inappropriate fluid overload. In contrast, an adequate intravascular volume is a prerequisite for mobilization. However, it may be hypothesized that a perioperative fluid excess may hinder postoperative mobilization due to the resulting increased cardiopulmonary demands of exercise.

### Conclusions

So far, no widely accepted recommendations are available for the optimal perioperative fluid regimen. A large variability in fluid regimen has been noted throughout the surgical specialties. Except for the relatively 'dry' regimen that have been advocated in pulmonary surgery,<sup>52 84 149</sup> it has been common practice to administer relatively large amounts of fluid (regardless of blood loss or anaesthetic technique).<sup>19 22 35 36 66 134</sup> Preoperative dehydration from preoperative fasting (often for >12 h), bowel preparation or underlying illness certainly needs to be corrected.

On the other hand, perioperative administration of large amounts of crystalloids seems to have significant side-effects in several organ systems including the heart, primarily due to the potential impairment of left ventricular stroke volume, and the possibility of developing myocardial ischaemia. Pulmonary function may be impaired by accumulation of interstitial fluid, which may contribute to the development of pulmonary oedema, atelectasis, pneumonia or respiratory failure.<sup>19</sup> The resulting decreased tissue oxygenation may lead to impaired wound healing. Paralytic ileus may be prolonged by excess perioperative fluid administration.<sup>70</sup> Finally, excess fluid administration accentuates the water- and sodium-conserving effects of the surgical stress response, and may increase the risk of electrolyte disturbances such as hyponatraemia and metabolic acidosis.<sup>20 118</sup>

In contrast, the widespread use of 'dry' fluid regimen in pulmonary surgery with resulting decrease in pulmonary morbidity supports the safety of low-volume fluid regimen in high-risk patients undergoing major surgical procedures.

Achievement of optimal fluid status is not just a matter of fluid substitution *per se* but is also related to the

pathophysiology of the surgery. To clarify the implications of perioperative fluid excess, randomized, prospective clinical studies are needed where 'high' vs 'low' fluid regimen are undertaken in well-defined surgical procedures. Outcome assessments from studies of various organ dysfunctions and the associated morbidity are necessary to provide rational recommendations for perioperative fluid administration.

## Acknowledgement

This work was supported by a grant from the Danish Research Council (number 22-01-0160).

## References

- Alpert RA, Roizen MF, Hamilton WK, et al. Intraoperative urinary output does not predict postoperative renal function in patients undergoing abdominal aortic revascularization. *Surgery* 1984; **95**: 707–11
- Andersen LJ, Jensen TU, Bestle MH, Bie P. Isotonic and hypertonic sodium loading in supine humans. *Acta Physiol Scand* 1999; **166**: 23–30
- Andersen LJ, Jensen TU, Bestle MH, Bie P. Gastrointestinal osmoreceptors and renal sodium excretion in humans. *Am J Physiol Regul Integr Comp Physiol* 2000; **278**: R287–94
- Andersen LJ, Norsk P, Johansen LB, Christensen P, Engstrom T, Bie P. Osmoregulatory control of renal sodium excretion after sodium loading in humans. *Am J Physiol* 1998; **275**: R1833–42
- Arief AH. Fatal postoperative pulmonary edema: pathogenesis and literature review. *Chest* 1999; **115**: 1371–7
- Artz. Clinical observations on the use of dextran and modified fluid gelatin in combat casualties. *Surgery* 1955; **37**: 612–21
- Axelsson K, Mollefors K, Olsson JO, Lingardh G, Widman B. Bladder function in spinal anaesthesia. *Acta Anaesthesiol Scand* 1985; **29**: 315–21
- Bailey HR, Ferguson JA. Prevention of urinary retention by fluid restriction following anorectal operations. *Dis Colon Rectum* 1976; **19**: 250–2
- Bergstrom JP, Larsson J, Nordstrom H, et al. Influence of injury and nutrition on muscle water and electrolytes: effect of severe injury, burns and sepsis. *Acta Chir Scand* 1987; **153**: 261–6
- Bessey PQ, Lowe KA. Early hormonal changes affect the catabolic response to trauma. *Ann Surg* 1993; **218**: 476–89
- Bessey PQ, Watters JM, Aoki TT, Wilmore DW. Combined hormonal infusion simulates the metabolic response to injury. *Ann Surg* 1984; **200**: 264–81
- Bonnet F, Harari A, Thibonnier M, Viars P. Suppression of antidiuretic hormone hypersecretion during surgery by extradural anaesthesia. *Br J Anaesth* 1982; **54**: 29–36
- Buggy D, Higgins P, Moran C, O'Brien D, O'Donovan F, McCarroll M. Prevention of spinal anaesthesia-induced hypotension in the elderly: comparison between preanesthetic administration of crystalloids, colloids, and no prehydration. *Anesth Analg* 1997; **84**: 106–10
- Burch JM, Moore EE, Moore FA, Franciose R. The abdominal compartment syndrome. *Surg Clin North Am* 1996; **76**: 833–42
- Bush HL, LoGerfo FW, Weisel RD, Mannick JA, Hechtman HB. Assessment of myocardial performance and optimal volume loading during elective abdominal aortic aneurysm resection. *Arch Surg* 1977; **112**: 1301–5
- Campbell ED. Prevention of urinary retention after anorectal operations. *Dis Colon Rectum* 1972; **15**: 69–70
- Chan ST, Kapadia CR, Johnson AV, Radcliffe AG, Dudley HA. Extracellular fluid volume expansion and third space sequestration at the site of small bowel anastomoses. *Br J Surg* 1983; **70**: 36–9
- Chobanian AV, Lille RD, Tercyak A, Blevins P. The metabolic and hemodynamic effects of prolonged bed rest in normal subjects. *Circulation* 1974; **49**: 551–9
- Christopherson R, Beattie C, Frank SM, et al. Perioperative morbidity in patients randomized to epidural or general anesthesia for lower extremity vascular surgery. *Anesthesiology* 1993; **79**: 422–34
- Chung HM, Kluge R, Schrier RW, Anderson RJ. Postoperative hyponatremia. A prospective study. *Arch Intern Med* 1986; **146**: 333–6
- Cleland J, Pluth JR, Tauxe WN, Kirklin JW. Blood volume and body fluid compartment changes soon after closed and open intracardiac surgery. *J Thorac Cardiovasc Surg* 1966; **52**: 698–705
- Cohn LH, Powell MR, Seidlitz L, Hamilton WK, Wylie EJ. Fluid requirements and shifts after reconstruction of the aorta. *Am J Surg* 1970; **120**: 182–6
- Collins JV, Cochrane GM, Davis J, Benatar SR, Clark TJ. Some aspects of pulmonary function after rapid saline infusion in healthy subjects. *Clin Sci Mol Med* 1973; **45**: 407–10
- Deleted
- Cousins MJ, Mazze RI. Anaesthesia, surgery and renal function: immediate and delayed effects. *Anaesth Intensive Care* 1973; **1**: 355–73
- Cousins MJ, Skowronski G, Plummer JL. Anaesthesia and the kidney. *Anaesth Intensive Care* 1983; **11**: 292–320
- Desborough JP. The stress response to trauma and surgery. *Br J Anaesth* 2000; **85**: 109–17
- Drummer C, Fiedler F, Konig A, Gerzer R. Urodilatin, a kidney-derived natriuretic factor, is excreted with a circadian rhythm and is stimulated by saline infusion in man. *J Am Soc Nephrol* 1991; **1**: 1109–13
- Drummer C, Gerzer R, Heer M, et al. Effects of an acute saline infusion on fluid and electrolyte metabolism in humans. *Am J Physiol* 1992; **262**: F744–54
- Drummer C, Heer M, Baisch F, et al. Diuresis and natriuresis following isotonic saline infusion in healthy young volunteers before, during, and after HDT. *Acta Physiol Scand Suppl* 1992; **604**: 101–11
- Finn PJ, Plank LD, Clark MA, Connolly AB, Hill GL. Progressive cellular dehydration and proteolysis in critically ill patients. *Lancet* 1996; **347**: 654–6
- Fuller JH, Bernauer EM, Adams WC. Renal function, water and electrolyte exchange during bed rest with daily exercise. *Aerosp Med* 1970; **41**: 60–72
- Deleted
- Gajraj NM, Victory RA, Pace NA, Van Elstraete AC, Wallace DH. Comparison of an ephedrine infusion with crystalloid administration for prevention of hypotension during spinal anaesthesia. *Anesth Analg* 1993; **76**: 1023–6
- Garnett RL, MacIntyre A, Lindsay P, et al. Perioperative ischaemia in aortic surgery: combined epidural/general anaesthesia and epidural analgesia vs general anaesthesia and i.v. analgesia. *Can J Anaesth* 1996; **43**: 769–77
- Glaser F, Sannwald GA, Buhr HJ, et al. General stress response to conventional and laparoscopic cholecystectomy. *Ann Surg* 1995; **221**: 372–80
- Greenleaf JE, Bernauer EM, Young HL, et al. Fluid and electrolyte



- shifts during bed rest with isometric and isotonic exercise. *J Appl Physiol* 1977; **42**: 59–66
- 38 Grocott MPW, Mythen MG. Fluid therapy. *Bailliere's Clin Anaesthesiol* 1999; **13**: 363–81
  - 39 Gump FE, Kinney JM, Iles M, Long CC. Duration and significance of large fluid loads administered for circulatory support. *J Trauma* 1970; **10**: 431–9
  - 40 Gutelius JR, Shizgal HM, Lopez G. The effect of trauma on extracellular water volume. *Arch Surg* 1968; **97**: 206–14
  - 41 Harden RP, Thompson WD, Ravdin IS, Frank IL. The influence of the serum protein on the motility of the small intestine. *Surg Gynecol Obstet* 2001; **66**: 819–21
  - 42 Hartmann M, Jonsson K, Zederfeldt B. Effect of tissue perfusion and oxygenation on accumulation of collagen in healing wounds. Randomized study in patients after major abdominal operations. *Eur J Surg* 1992; **158**: 521–6
  - 43 Hatch DA, Barry JM, Norman DJ. A randomized study of intravenous fluid replacement following living-donor renal transplantation. *Transplantation* 1985; **40**: 648–51
  - 44 Heughan C, Ninikoski J, Hunt TK. Effect of excessive infusion of saline solution on tissue oxygen transport. *Surg Gynecol Obstet* 1972; **135**: 257–60
  - 45 Hillebrecht A, Schulz H, Meyer M, Baisch F, Beck L, Blomqvist CG. Pulmonary responses to lower body negative pressure and fluid loading during head-down tilt bedrest. *Acta Physiol Scand Suppl* 1992; **604**: 35–42
  - 46 Hirano T, Yoshioka H. Post-operative urinary retention after inguinal herniorrhaphy with spinal anaesthesia. *Med Sci Res* 1993; **21**: 693–4
  - 47 Hutchin P, Terzi RG, Hollandsworth LC. Renal response to intraoperative fluid administration. *Surg Gynecol Obstet* 1969; **129**: 795–8
  - 48 Ishihara H, Ishida K, Oyama T, Kudo T, Kudo M. Effects of general anaesthesia and surgery on renal function and plasma ADH levels. *Can Anaesth Soc J* 1978; **25**: 312–8
  - 49 Jackson R, Reid JA, Thorburn J. Volume preloading is not essential to prevent spinal-induced hypotension at Caesarean section. *Br J Anaesth* 1995; **75**: 262–5
  - 50 Janvrin SB, Davies G, Greenhalgh RM. Postoperative deep vein thrombosis caused by intravenous fluids during surgery. *Br J Surg* 1980; **67**: 690–3
  - 51 Jonsson K, Jensen JA, Goodson WH, et al. Tissue oxygenation, anemia, and perfusion in relation to wound healing in surgical patients. *Ann Surg* 1991; **214**: 605–13
  - 52 Jordan S, Mitchell JA, Quinlan GJ, Goldstraw P, Evans TW. The pathogenesis of lung injury following pulmonary resection. *Eur Respir J* 2000; **15**: 790–9
  - 53 Kachadorian WA, Johnson RE. Renal responses to various rates of exercise. *J Appl Physiol* 1970; **28**: 748–52
  - 54 Kamp-Jensen M, Olesen KL, Bach V, Schutten HJ, Engquist A. Changes in serum electrolyte and atrial natriuretic peptide concentrations, acid-base and haemodynamic status after rapid infusion of isotonic saline and Ringer lactate solution in healthy volunteers. *Br J Anaesth* 1990; **64**: 606–10
  - 55 Karinen J, Rasanen J, Alahuhta S, Jouppila R, Jouppila P. Effect of crystalloid and colloid preloading on uteroplacental and maternal haemodynamic state during spinal anaesthesia for Caesarean section. *Br J Anaesth* 1995; **75**: 531–5
  - 56 Karoutsos S, Nathan N, Lahrimi A, Grouille D, Feiss P, Cox DJ. Thrombelastogram reveals hypercoagulability after administration of gelatin solution. *Br J Anaesth* 1999; **82**: 175–7
  - 57 Kehlet H. Modification of responses to surgery by neural blockade: clinical implications. In: Cousins MJ, Bridenbaugh PO, eds. *Neural Blockade in Clinical Anesthesia and Management of Pain*, 3rd Edn. Philadelphia: Lippincott-Raven, 1998; 129–75
  - 58 Kehlet H. Surgical stress response: does endoscopic surgery confer an advantage? *World J Surg* 1999; **23**: 801–7
  - 59 Kidd JE, Gilchrist NL, Utley RJ, Nicholls MG, Espiner EA, Yandle TG. Effect of opiate, general anaesthesia and surgery on plasma atrial natriuretic peptide levels in man. *Clin Exp Pharmacol Physiol* 1987; **14**: 755–60
  - 60 Kongstad L, Moller AD, Grande PO. Reflection coefficient for albumin and capillary fluid permeability in cat calf muscle after traumatic injury. *Acta Physiol Scand* 1999; **165**: 369–77
  - 61 Kozol RA, Mason K, McGee K. Post-herniorrhaphy urinary retention: a randomized prospective study. *J Surg Res* 1992; **52**: 111–2
  - 62 Kudoh A, Ishihara H, Matsuki A. Renin-aldosterone system and atrial natriuretic peptide during anesthesia in orthopedic patients over 80 years of age. *J Clin Anesth* 1999; **11**: 101–7
  - 63 Kudoh A, Sakai T, Ishihara H, Matsuki A. Renin-aldosterone in elderly patients with hyperkalaemia under anaesthesia. *Eur J Anaesthesiol* 1999; **16**: 231–5
  - 64 Ladegaard-Pedersen HJ. Postoperative changes in blood volume and colloid osmotic pressure. *Acta Chir Scand* 1969; **135**: 94–104
  - 65 Ladegaard-Pedersen HJ, Engell HC. A comparison between the changes in the distribution volumes of inulin and  $[^{51}\text{Cr}]\text{EDTA}$  after major surgery. *Scand J Clin Lab Invest* 1975; **35**: 109–13
  - 66 Lang K, Boldt J, Suttner S, Haisch G. Colloids versus crystalloids and tissue oxygen tension in patients undergoing major abdominal surgery. *Anesth Analg* 2001; **93**: 405–9
  - 67 Le Roith D, Bark H, Nyska M, Glick SM. The effect of abdominal pressure on plasma antidiuretic hormone levels in the dog. *J Surg Res* 1982; **32**: 65–9
  - 68 Lewis H, Wilkins M, Selwyn B, Yelland U, Griffith M, Bhoola KD. Relationship between ANP, cyclic GMP and tissue kallikrein following saline infusion in healthy volunteers. *Adv Exp Med Biol* 1989; **247A**: 281–6
  - 69 Liu SS, McDonald SB. Current issues in spinal anesthesia. *Anesthesiology* 2001; **94**: 888–906
  - 70 Lobo DN, Bostock KA, Neal KR, Perkins AC, Rowlands BJ, Allison SP. Effect of salt and water balance on recovery of gastrointestinal function after elective colonic resection: a randomised control trial. *Lancet* 2002; **359**: 1812–18
  - 71 Lobo DN, Stanga Z, Simpson JA, Anderson JA, Rowlands BJ, Allison SP. Dilution and redistribution effects of rapid 2-litre infusions of 0.9% (w/v) saline and 5% (w/v) dextrose on haematological parameters and serum biochemistry in normal subjects: a double-blind crossover study. *Clin Sci (Lond)* 2001; **101**: 173–9
  - 72 Lundberg J, Lundberg D, Norgren L, Werner O. Dopamine counteracts hypertension during general anesthesia and hypotension during combined thoracic epidural anesthesia for abdominal aortic surgery. *J Cardiothorac Anesth* 1990; **4**: 348–53
  - 73 Lundsgaard-Hansen P, Pappova E. Colloids versus crystalloids as volume substitutes: clinical relevance of the serum oncotic pressure. *Ann Clin Res* 1981; **13** (Suppl 33): 5–17
  - 74 Lundvall J, Lanne T. Large capacity in man for effective plasma volume control in hypovolaemia via fluid transfer from tissue to blood. *Acta Physiol Scand* 1989; **137**: 513–20
  - 75 MacLennan FM, MacDonald AF, Campbell DM. Lung water during the puerperium. *Anaesthesia* 1987; **42**: 141–7
  - 76 Mangano DT, Van Dyke DC, Ellis RJ. The effect of increasing preload on ventricular output and ejection in man. Limitations of the Frank-Starling Mechanism. *Circulation* 1980; **62**: 535–41
  - 77 Manny J, Grindlinger GA, Dennis RC, Weisel RD, Hechtman HB.

- Myocardial performance curves as guide to volume therapy. *Surg Gynecol Obstet* 1979; **149**: 863–73
- 78 Marhofer P, Faryniak B, Oismuller C, Koinig H, Kapral S, Mayer N. Cardiovascular effects of 6% hetastarch and lactated Ringer's solution during spinal anesthesia. *Reg Anesth Pain Med* 1999; **24**: 399–404
  - 79 Matthay MA, Fukuda N, Frank J, Kallet R, Daniel B, Sakuma T. Alveolar epithelial barrier. Role in lung fluid balance in clinical lung injury. *Clin Chest Med* 2000; **21**: 477–90
  - 80 Maxwell RA, Fabian TC, Croce MA, Davis KA. Secondary abdominal compartment syndrome: an underappreciated manifestation of severe hemorrhagic shock. *J Trauma* 1999; **47**: 995–9
  - 81 Melada GA, Goldman RH, Luetscher JA, Zager PG. Hemodynamics, renal function, plasma renin, and aldosterone in man after 5 to 14 days of bedrest. *Aviat Space Environ Med* 1975; **46**: 1049–55
  - 82 Miller PB, Johnson RL, Lamb LE. Effects of four weeks of absolute bed rest on circulatory functions in man. *Aerosp Med* 1964; **35**: 1194–2000
  - 83 Miller PB, Johnson RL, Lamb LE. Effects of moderate physical exercise during four weeks of bed rest on circulatory functions in man. *Aerosp Med* 1965; **35**: 1077–82
  - 84 Mitchell JP, Schuller D, Calandrino FS, Schuster DP. Improved outcome based on fluid management in critically ill patients requiring pulmonary artery catheterization. *Am Rev Respir Dis* 1992; **145**: 990–8
  - 85 Moore FD. *Metabolic Care of the Surgical Patient*. Philadelphia: WB Saunders Co., 1959
  - 86 Moore FD, Shires G. Moderation. *Ann Surg* 1967; **166**: 300–1
  - 87 Mullins RJ, Garrison RN. Fractional change in blood volume following normal saline infusion in high-risk patients before noncardiac surgery. *Ann Surg* 1989; **209**: 651–9
  - 88 Mutoh T, Lamm WJ, Embree LJ, Hildebrandt J, Albert RK. Volume infusion produces abdominal distension, lung compression, and chest wall stiffening in pigs. *J Appl Physiol* 1992; **72**: 575–82
  - 89 Mythen MG, Webb AR. Perioperative plasma volume expansion reduces the incidence of gut mucosal hypoperfusion during cardiac surgery. *Arch Surg* 1995; **130**: 423–9
  - 90 Needleman P, Greenwald JE. Atriopeptin: a cardiac hormone intimately involved in fluid, electrolyte, and blood-pressure homeostasis. *N Engl J Med* 1986; **314**: 828–34
  - 91 Nielsen OM, Engell HC. Extracellular fluid volume and distribution in relation to changes in plasma colloid osmotic pressure after major surgery. A randomized study. *Acta Chir Scand* 1985; **151**: 221–5
  - 92 Nielsen OM, Engell HC. Increased glomerular filtration rate in patients after reconstructive surgery on the abdominal aorta. *Br J Surg* 1986; **73**: 34–7
  - 93 Nielsen OM, Engell HC. The importance of plasma colloid osmotic pressure for interstitial fluid volume and fluid balance after elective abdominal vascular surgery. *Ann Surg* 1986; **203**: 25–9
  - 94 Norsk P, Drummer C, Rocker L, et al. Renal and endocrine responses in humans to isotonic saline infusion during microgravity. *J Appl Physiol* 1995; **78**: 2253–9
  - 95 Parquin F, Marchal M, Mehiri S, Herve P, Lescot B. Post-pneumonectomy pulmonary edema: analysis and risk factors. *Eur J Cardiothorac Surg* 1996; **10**: 929–32
  - 96 Parving HH, Rossing N, Nielsen SL, Lassen NA. Increased transcapillary escape rate of albumin, IgG, and IgM after plasma volume expansion. *Am J Physiol* 1974; **227**: 245–50
  - 97 Patel RL, Townsend ER, Fountain SW. Elective pneumonectomy: factors associated with morbidity and operative mortality. *Ann Thorac Surg* 1992; **54**: 84–8
  - 98 Pavlin DJ, Pavlin EG, Fitzgibbon DR, Koerschgen ME, Plitt TM. Management of bladder function after outpatient surgery. *Anesthesiology* 1999; **91**: 42–50
  - 99 Petros JG, Alameddine F, Testa E, Rimm EB, Robillard RJ. Patient-controlled analgesia and postoperative urinary retention after hysterectomy for benign disease. *J Am Coll Surg* 1994; **179**: 663–7
  - 100 Petros JG, Bradley TM. Factors influencing postoperative urinary retention in patients undergoing surgery for benign anorectal disease. *Am J Surg* 1990; **159**: 374–6
  - 101 Petros JG, Mallen JK, Howe K, Rimm EB, Robillard RJ. Patient-controlled analgesia and postoperative urinary retention after open appendectomy. *Surg Gynecol Obstet* 1993; **177**: 172–5
  - 102 Petros JG, Rimm EB, Robillard RJ. Factors influencing urinary tract retention after elective open cholecystectomy. *Surg Gynecol Obstet* 1992; **174**: 497–500
  - 103 Petros JG, Rimm EB, Robillard RJ, Argy O. Factors influencing postoperative urinary retention in patients undergoing elective inguinal herniorrhaphy. *Am J Surg* 1991; **161**: 431–3
  - 104 Polanczyk CA, Rohde LE, Goldman L, et al. Right heart catheterization and cardiac complications in patients undergoing noncardiac surgery: an observational study. *JAMA* 2001; **286**: 309–14
  - 105 Pouta AM, Karinen J, Vuolteenaho OJ, Laatikainen TJ. Effect of intravenous fluid preload on vasoactive peptide secretion during Caesarean section under spinal anaesthesia. *Anaesthesia* 1996; **51**: 128–32
  - 106 Priano LL, Smith JD, Cohen JL, Everts EE. Intravenous fluid administration and urine output during radical neck surgery. *Head Neck* 1993; **15**: 208–15
  - 107 Prien T, Backhaus N, Pelster F, Pircher W, Bunte H, Lawin P. Effect of intraoperative fluid administration and colloid osmotic pressure on the formation of intestinal edema during gastrointestinal surgery. *J Clin Anesth* 1990; **2**: 317–23
  - 108 Pull ter Gunne AJ, Bruining HA, Obertop H. Haemodynamics and 'optimal' hydration in aortic cross clamping. *Neth J Surg* 1990; **42**: 113–7
  - 109 Ratner LE, Smith GW. Intraoperative fluid management. *Surg Clin North Am* 1993; **73**: 229–41
  - 110 Roberts JP, Roberts JD, Skinner C, Shires GT, Illner H, Canizaro PC. Extracellular fluid deficit following operation and its correction with Ringer's lactate. A reassessment. *Ann Surg* 1985; **202**: 1–8
  - 111 Rodgers A, Walker N, Schug S, et al. Reduction of postoperative mortality and morbidity with epidural or spinal anaesthesia: results from overview of randomised trials. *Br Med J* 2000; **321**: 1493–7
  - 112 Roth E, Lax LC, Maloney JV. Ringer's lactate solution and extracellular fluid volume in the surgical patient: a critical analysis. *Ann Surg* 1969; **169**: 149–64
  - 113 Rout CC, Locke DA, Levin J, Gouws E, Reddy D. A reevaluation of the role of crystalloid preload in the prevention of hypotension associated with spinal anesthesia for elective Cesarean section. *Anesthesiology* 1993; **79**: 262–9
  - 114 Ruttman TG, James MF, Aronson I. *In vivo* investigation into the effects of haemodilution with hydroxyethyl starch (200/0.5) and normal saline on coagulation. *Br J Anaesth* 1998; **80**: 612–6
  - 115 Ruttman TG, James MF, Viljoen JF. Haemodilution induces a hypercoagulable state. *Br J Anaesth* 1996; **76**: 412–4
  - 116 Ruttman TG, James MF, Lombard EH. Haemodilution-induced enhancement of coagulation is attenuated in vitro by restoring antithrombin III to pre-dilution concentrations. *Anaesth Intensive Care* 2001; **29**: 489–93

- 117 Sapolsky RM, Romero LM, Munck AU. How do glucocorticoids influence stress responses? Integrating permissive, suppressive, stimulatory, and preparative actions. *Endocr Rev* 2000; **21**: 55–89
- 118 Scheingraber S, Rehm M, Sehmisch C, Finsterer U. Rapid saline infusion produces hyperchloremic acidosis in patients undergoing gynecologic surgery. *Anesthesiology* 1999; **90**: 1265–70
- 119 Schutten HJ, Johannessen AC, Torp-Pedersen C, Sander-Jensen K, Bie P, Warberg J. Central venous pressure—a physiological stimulus for secretion of atrial natriuretic peptide in humans? *Acta Physiol Scand* 1987; **131**: 265–72
- 120 Scoma JA. Catheterization in anorectal surgery. *Arch Surg* 1975; **110**: 1506
- 121 Sharrock NE, Cazan MG, Hargett MJ, Williams-Russo P, Wilson PDJ. Changes in mortality after total hip and knee arthroplasty over a ten-year period. *Anesth Analg* 1995; **80**: 242–8
- 122 Sharrock NE, Mather LE, Go G, Sculco TP. Arterial and pulmonary arterial concentrations of the enantiomers of bupivacaine after epidural injection in elderly patients. *Anesth Analg* 1998; **86**: 812–7
- 123 Sharrock NE, Mineo R, Urquhart B. Hemodynamic response to low-dose epinephrine infusion during hypotensive epidural anesthesia for total hip replacement. *Reg Anesth* 1990; **15**: 295–9
- 124 Sharrock NE, Mineo R, Urquhart B. Haemodynamic effects and outcome analysis of hypotensive extradural anaesthesia in controlled hypertensive patients undergoing total hip arthroplasty. *Br J Anaesth* 1991; **67**: 17–25
- 125 Shippy CR, Shoemaker WC. Hemodynamic and colloid osmotic pressure alterations in the surgical patient. *Crit Care Med* 1983; **11**: 191–5
- 126 Shires GT, Barber A. Fluid and electrolyte management of the surgical patient. In: Schwartz RW, Shires GT, Daly JM, eds. *Principles of Surgery*, 6th Edn. New York: McGraw Hill, 1997; 53–75
- 127 Shires GT, Carrico J, Lightfoot S. Fluid therapy in hemorrhagic shock. *Arch Surg* 1964; **88**: 688–93
- 128 Shires GT, Jackson DE. Postoperative salt tolerance. *Arch Surg* 1962; **84**: 703–9
- 129 Shires T, Williams J, Brown F. Acute change in extracellular fluids associated with major surgical procedures. *Ann Surg* 1961; **154**: 803–10
- 130 Shoemaker WC, Appel P, Bland R. Use of physiologic monitoring to predict outcome and to assist in clinical decisions in critically ill postoperative patients. *Am J Surg* 1983; **146**: 43–50
- 131 Sinclair S, James S, Singer M. Intraoperative intravascular volume optimisation and length of hospital stay after repair of proximal femoral fracture: randomised controlled trial. *Br Med J* 1997; **315**: 909–12
- 132 Sinnatamby C, Edwards CR, Kitau, Irving MH. Antidiuretic hormone response to high and conservative fluid regimes in patients undergoing operation. *Surg Gynecol Obstet* 1974; **139**: 715–9
- 133 Slinger PD. Perioperative fluid management for thoracic surgery: the puzzle of postpneumectomy pulmonary edema. *J Cardiothorac Vasc Anesth* 1995; **9**: 442–51
- 134 Thompson JE, Vollman RW, Austin DJ, Kartchner MM. Prevention of hypotensive and renal complications of aortic surgery using balanced salt solution: thirteen-year experience with 670 cases. *Ann Surg* 1968; **167**: 767–77
- 135 Turnage WS, Lunn JJ. Postpneumectomy pulmonary edema. A retrospective analysis of associated variables. *Chest* 1993; **103**: 1646–50
- 136 Ueyama H, He YL, Tanigami H, Mashimo T, Yoshiya I. Effects of crystalloid and colloid preload on blood volume in the parturient undergoing spinal anesthesia for elective Cesarean section. *Anesthesiology* 1999; **91**: 1571–6
- 137 Verheijen-Breemhaar L, Bogaard JM, van den Berg B, Hilvering C. Post-pneumectomy pulmonary edema. *Thorax* 1988; **43**: 323–6
- 138 Virtue RW, LeVine DS, Aikawa JK. Fluid shifts during the surgical period: RISA and S35 determinations following glucose, saline or lactate infusion. *Ann Surg* 1966; **163**: 523–8
- 139 Waller DA, Gebitekin C, Saunders NR, Walker DR. Noncardiogenic pulmonary edema complicating lung resection. *Ann Thorac Surg* 1993; **55**: 140–3
- 140 Watters JM, Bessey PQ, Dinarello CA, Wolff SM, Wilmore DW. Both inflammatory and endocrine mediators stimulate host responses to sepsis. *Arch Surg* 1986; **121**: 179–90
- 141 Whittemore AD, Clowes AW, Hechtman HB, Mannick JA. Aortic aneurysm repair. Reduced operative mortality associated with maintenance of optimal cardiac performance. *Ann Surg* 1980; **192**: 414–21
- 142 Williams GH, Duhly RG. Hypertensive states: associated fluid and electrolyte disturbances. In: Narins RG, ed. *Maxwell and Kleman's Clinical Disorder of Fluid and Electrolyte Metabolism*, 5th Edn. New York: McGraw-Hill, 1994, 1619–48
- 143 Wilmore DW. Metabolic response to severe surgical illness: overview. *World J Surg* 2000; **24**: 705–11
- 144 Wilmore DW, Smith RJ, O'Dwyer ST. The gut—a central organ following surgical stress. *Surgery* 2000; **104**: 917–23
- 145 Woods MS, Kelley H. Oncotic pressure, albumin and ileus: the effect of albumin replacement on postoperative ileus. *Am Surg* 1993; **59**: 758–63
- 146 Yamaji T, Ishibashi M, Takaku F. Atrial natriuretic factor in human blood. *J Clin Invest* 1985; **76**: 1705–9
- 147 Zaloga GP, Hughes SS. Oliguria in patients with normal renal function. *Anesthesiology* 1990; **72**: 598–602
- 148 Zayas V, Blumenfeld J, Bading B. Adrenergic regulation of renin secretion and renal hemodynamics during deliberate hypotension in man. *Am J Physiol* 1993; **265**: F686–92
- 149 Zeldin RA, Normandin D, Landtwinig D, Peters RM. Postpneumectomy pulmonary edema. *J Thorac Cardiovasc Surg* 1984; **87**: 359–65
- 150 Zorbas YG, Andreyev VG, Popescu LB. Fluid-electrolyte metabolism and renal function in men under hypokinesia and physical exercise. *Int Urol Nephrol* 1988; **20**: 215–23
